1 **Coevolution of retroviruses with *SERINC*s following whole-genome duplication**  
2 **divergence**

3

4 Pavitra Ramdas<sup>1</sup>, Vipin Bhardwaj<sup>1</sup>, Aman Singh<sup>1</sup>, Nagarjun Vijay<sup>2</sup>, Ajit Chande<sup>1\*</sup>

5 <sup>1</sup>*Molecular Virology Laboratory* & <sup>2</sup>*Computational Evolutionary Genomics Lab from the*  
6 *Department of Biological Sciences, Indian Institute of Science Education and Research (IISER)*  
7 *Bhopal, India.*

8

9 **Abstract**

10 The *SERINC* gene family comprises of five paralogs in humans of which *SERINC3* and  
11 *SERINC5* inhibit HIV-1 infectivity and are counteracted by Nef. The origin of this anti-retroviral  
12 activity, its prevalence among the remaining human paralogs, and its ability to target  
13 retroviruses remain largely unknown. Here we show that despite their early divergence, the  
14 anti-retroviral activity is functionally conserved among four human *SERINC* paralogs with  
15 *SERINC2* being an exception. The lack of activity in human *SERINC2* is associated with its  
16 post-whole genome duplication (WGD) divergence, as evidenced by the ability of pre-WGD  
17 orthologs from yeast, fly, and a post-WGD-proximate *SERINC2* from coelacanth to inhibit nef-  
18 defective HIV-1. Intriguingly, potent retroviral factors from HIV-1 and MLV are not able to relieve  
19 the *SERINC2*-mediated particle infectivity inhibition, indicating that such activity was directed  
20 towards other retroviruses that are found in coelacanth (like foamy viruses). However, foamy-  
21 derived vectors are intrinsically resistant to the action of *SERINC2*, and we show that a foamy  
22 virus envelope confers this resistance. Despite the presence of weak arms-race signatures, the  
23 functional reciprocal adaptation among *SERINC2* and *SERINC5* and, in response, the  
24 emergence of antagonizing ability in foamy virus appears to have resulted from a long-term  
25 conflict with the host.

26

27 **Keywords:** arms-race, *SERINC*, restriction factors, anti-retroviral, whole-genome duplication

28

29 **Introduction**

30 Viruses have been exploiting the host machinery for their persistence, and, in response, the  
31 host has continued to evolve increasingly intricate antiviral defense strategies. As part of this  
32 ongoing arms-race, while viruses have relied on acquisition and fusion of diverse genes (1),  
33 the host-defense mechanism has been made possible by the functional divergence of gene  
34 copies following duplication of genes as well as whole-genomes (2–7). Restriction factors being  
35 at the forefront of this long-term conflict (8–10), show clear molecular signatures of arms-race  
36 (11,12). In fact, the presence of these signatures has been proposed to be a hallmark of  
37 restriction factors (8,13), and has been used as a screening strategy to identify potential  
38 candidates(2,14). In contrast, the recently identified anti-retroviral host inhibitors *SERINC5* and  
39 *SERINC3* display an uneventful evolutionary history (15). This is counterintuitive, because  
40 distant retroviruses, with wide host-range, encode anti-*SERINC5* virulent factors (16–18). We,

41 therefore, sought to trace the origins of this antiretroviral activity and its relevance for retroviral  
42 inhibition. Our analysis to comprehend the evolutionary origins of the antiretroviral activity in  
43 *SERINC*s, identifies an active *SERINC2* with a hitherto unknown interaction with a foamy virus.

44

## 45 **Results**

### 46 **Antiretroviral activity among human *SERINC* paralogs**

47 Analysis of sequence similarity and gene structure conservation reveals that *SERINC5* and  
48 *SERINC4* share a recent ancestry (**Fig-S1**). Similarly, *SERINC3* and *SERINC1* paralogs are  
49 most similar to each other (~60% identity). Despite having the lowest sequence similarity to  
50 either of the established anti-viral *SERINC* paralogs, *SERINC2* is relatively similar to *SERINC3*  
51 (50%) and *SERINC5* (37%). Given such levels of sequence similarity and conserved membrane  
52 topology (**Fig-S2**), we checked the activity of other paralogs to inhibit HIV-1 infectivity in addition  
53 to *SERINC5* and *SERINC3*. From the native versions of *SERINC1* and *SERINC4* we failed to  
54 express the proteins, so we decided to generate codon-optimized versions of these genes.  
55 Having found the proteins being expressed upon codon optimization (**Fig1A**), we used these  
56 conditions to check the inhibitory activity of *SERINC1* and *SERINC4*. We find that *SERINC2* is  
57 the only *SERINC* to have no activity against HIV-1 while all the other *SERINC*s inhibit the virus  
58 infectivity to a varying degree (**Fig-1A and 1B**). Despite less-prominent membrane localization,  
59 *SERINC4* has a potent activity and is second-most powerful in inhibiting the virus (**Fig-1C**).

60 In contrast to other restriction factors, *SERINC5* and *SERINC3* genes have a rather uneventful  
61 history that is distinct from the traditional signatures of recurrent selection seen in genes that  
62 are part of an arms-race (19). We investigated the generality of whether the absence of  
63 signatures of positive selection was prevalent across all the *SERINC* paralogs. Towards this,  
64 we compared the evolutionary signature of *SERINC* genes with previously identified restriction  
65 factors, genes showing recurrent positive selection and a few functionally characterized genes  
66 that can act as controls (**Fig-1D**). Within *SERINC* paralogs there is heterogeneity in the patterns  
67 of positive selection, with *SERINC1* and *SERINC5* showing the least number of positively  
68 selected residues while, *SERINC3* and *SERINC4* have relatively a greater number of residues  
69 under episodic diversifying selection (**Fig-1D; FigS3, S4**; arms-race signature inference is  
70 found to be sensitive to the multiple sequence alignment tool used, see **Fig-S5**). Functionally  
71 though, *SERINC4* and *SERINC5* are the most potent antiretroviral inhibitors compared to the  
72 other three *SERINC*s, suggesting that merely the fraction of sites that are positively selected is  
73 not an indicator of its ability to inhibit the retrovirus. Although the arms race signatures of few  
74 restriction factors such as BST-2 and EIAF2AK2 were well correlated, the other newly identified  
75 restriction factors, including *SERINC*s did not show any consistent pattern of clustering (**Fig-**  
76 **1D**). One of the prime features of restriction factors has been their ability to get augmented  
77 upon interferon stimulation. While the genes which formed a cluster are interferon responsive  
78 (IFN responsive genes were obtained from ref (20)), this property did not explain the overall  
79 pattern of clustering (**Fig-1D**). Arms race signatures are not prominent in several interferon-  
80 inducible genes and innate immune genes, including TLRs (**Fig-1D**). Hence the lack of arms

81 race signatures in *SERINC*s is probably not very surprising. The ability to restrict HIV-1 among  
82 human *SERINC1* and *SERINC4* suggests that this is an evolutionarily conserved feature  
83 despite the early divergence of these paralogous copies. Hence, we further decided to  
84 investigate the evolutionary origins of this anti-retroviral activity.

85

#### 86 **Anti-retroviral activity in an ancient feature among *SERINC5* orthologs**

87 *SERINC*s plausibly shaped retroviral evolution, as indicated by the parallel emergence of anti-  
88 *SERINC5* activity among diverse retroviral genomes. *SERINC* gene family of restriction factors  
89 is conserved across eukaryotic species with evident topological similarity (**Fig-S6**), so we asked  
90 to what extent the ability of *SERINC* orthologs to restrict HIV-1 is conserved. Unicellular  
91 eukaryotes and invertebrates have a single copy of the *SERINC* gene (*TMS1*); all these  
92 orthologs could restrict *nef*-defective HIV-1 (**Fig-1E and 1F**), albeit the yeast ortholog having  
93 modest activity (2-fold) in comparison to all other orthologs (fold inhibition from 4-36). This lower  
94 potency compared to all other orthologs could be attributed to inadequate localization on the  
95 membrane or heterologous host expression for yeast and fly *TMS1* in conditions where the  
96 remaining orthologs were adequately expressed on the membrane (**Fig-1G**). Western blot  
97 analysis confirmed the expression of C-terminal HA-tagged *TMS1* and other *SERINC5*  
98 orthologs (**Fig-1E**, lower panel).

99

#### 100 **Coelacanth *SERINC2* restricts HIV-1**

101 Two rounds of WGD in the ancestor of chordates led to a large increase in the number of genes  
102 leading to the acquisition of new functions. This repertoire of genes also provides greater  
103 flexibility due to their mutually compensatory functions. Hence post-WGD paralogous copies  
104 tend to diversify. A single copy of *SERINC* ortholog (*TMS1*) is present in pre-WGD species and,  
105 post- WGD, the number of copies has increased to five in tetrapods and six in bony fishes  
106 (**FigS1**). Our investigation of the pre-WGD ortholog of *SERINC* genes from the yeast (*S.*  
107 *cerevisiae*) and the fly (*D. melanogaster*) *TMS1*, found evidence of anti-retroviral activity (**Fig-**  
108 **1E**). Functional data on the human paralogs also suggests an ancestrally conserved activity of  
109 *SERINC*s in restricting HIV-1, *SERINC2*, however, being an exception (**Fig1A**). Hence, the  
110 human *SERINC2* paralog may have lost the ability to restrict HIV sometime after the WGD  
111 (~700 to 400 MYA)(21). It is plausible that the species proximal to the WGD-event might retain  
112 a version of *SERINC2* with antiviral activity (**Fig-2A**). We, therefore, decided to systematically  
113 screen *SERINC2* orthologs from post-WGD species at varying levels of sequence divergence  
114 from human *SERINC2*. This exercise revealed that Coelacanth *SERINC2* restricts HIV-1 in  
115 conditions where *SERINC2* isoforms from human did not show any activity (**Fig-2B**). A shorter  
116 isoform of the Human *SERINC2* (Human-201) was found to be topologically similar (**Fig-S7**) to  
117 that of Coelacanth *SERINC2* but lacked the activity to restrict HIV-1 concurrent with the longer  
118 isoform.

119

120

121

## 122 **The gradual loss of antiretroviral activity in *SERINC2***

123 Upon further assessment of anti-HIV-1 activity of post-WGD *SERINC2* orthologs, we find that  
124 while Coelacanth *SERINC2* reduced the infectivity by ~7-fold, *Xenopus* *SERINC2* exhibited a  
125 modest inhibition (~2-fold). The activity was completely lost in chicken *SERINC2* ortholog  
126 onwards, this is despite the topology being conserved and the levels of virus-incorporation for  
127 chicken ortholog were also appreciable (**Fig-2C, S8 and S9**). This lack of activity, however, is  
128 persistent in mouse, horse and human *SERINC2* (**Fig-2C and 2D**). Coelacanth *SERINC2*  
129 restricted HIV-1 to a lesser extent compared to human *SERINC5*; however, it was more potent  
130 than human *SERINC3* and *SERINC1*. Further, reduced restriction potency can be attributed to  
131 its inadequate membrane presence (**Fig-2E**), reminiscent of localization of the pre-WGD  
132 orthologs from yeast and fly TMS-1 (**Fig-1G**). We see that there is a dose-dependent inhibition  
133 when coelacanth *SERINC2* was expressed from the plasmids carrying the promoters of  
134 different strengths (**Fig-S10**). Western blot of C-terminal HA-tagged *SERINC* expressors  
135 verified that each of these *SERINC2* orthologs is expressed from the synthetic genes (**Fig-2C**,  
136 lower panel). Loss of human *SERINC2* antiviral activity could have been associated with  
137 changes in pathogen repertoire or simply gain of a new function. To experimentally test if this  
138 was in response to change in the pathogen repertoire, we asked if the counteraction of Human  
139 *SERINC5* by known retroviral factors, HIV-1 Nef<sup>1</sup> and MLV GlycoGag<sup>1</sup>, was analogous to that  
140 of Coelacanth *SERINC2*. In conditions where Nef and GlycoMA efficiently counteracted the  
141 potent restriction imposed by Human *SERINC5* and the partial restriction of *Xenopus* *SERINC2*,  
142 we find that counteraction of Coelacanth *SERINC2* restriction by these virulent factors was not  
143 appreciable (**Fig-3A and 3B**). We also inspected if the nef alleles from human and non-human  
144 primate lentiviruses showed a similar phenotype and found that nef alleles did not rescue the  
145 infectivity comparable to that of *SERINC5* (**Fig-3C**). The ability of *SERINC5* to restrict HIV-1  
146 inhibition varies with the envelope glycoproteins used for pseudotyping. We checked if this is  
147 the case with coelacanth *SERINC2* as well. Coelacanth *SERINC2* action indeed phenocopied  
148 to that of human *SERINC5* in terms of the envelope sensitivity (**Fig-3D**). However, the retroviral  
149 factors still failed to rescue this analogous activity of coelacanth *SERINC2*.

150

## 151 **Functional evidence for arms-race dynamics**

152 Three distinct genera of retroviruses were reported to have independently come up with  
153 antagonizing factors to elude the inhibition by *SERINC5*. Having no activity in Nef and Glycogag  
154 against coelacanth *SERINC2* (**Fig-3A and 3B**) whether represents a new case of functional  
155 arms-race dynamics is what we wanted to check next (16–18,22) (**Fig-3E**). We learnt that  
156 coelacanth fish has an endogenous foamy virus (23) the genome organization of which  
157 resembled the prototype foamy virus (**Fig-4A**). The activity of coelacanth *SERINC2* may have  
158 been linked to a foamy virus infection of the host. To experimentally test the idea of whether  
159 *SERINC2* has in-fact evolved to restrict foamy viruses, we checked the presence of anti-foamy  
160 virus activity in human *SERINC* paralogs as well as the *SERINC2* orthologs. Unexpectedly, we

161 find that foamy is insensitive to any of the human *SERINC* paralogs tested as well as the  
162 coelacanth *SERINC2*, in conditions where HIV-1 was consistently inhibited (**Fig-4B**). We  
163 argued that this might have been associated with an intrinsic ability of a Foamy virus-encoded  
164 factor to counter the inhibition. To dissect this, we co-expressed foamy genes individually to  
165 check its ability to rescue, now, *nef*-defective HIV-1 such that the insensitivity of foamy and the  
166 presence of antagonizing factor can be revealed. Surprisingly, with none of the foamy  
167 components expressed *in-trans* we find an ability to rescue the *nef*-defective HIV-1 in the  
168 presence of Human *SERINC5* (**Fig-4C**). The inhibition exerted by coelacanth *SERINC2*,  
169 however, was antagonized by the Envelope glycoprotein of Foamy virus using an equivalent  
170 amount of *nef* expressing plasmid (**Fig-4D**), as well as in a dose-dependent manner (**Fig-S11**).  
171 We interrogated if this rescue was an effect of cross-packaging of the HIV-1 core by the foamy-  
172 virus envelope glycoprotein. By using a pseudoparticle comprising of an HIV core  
173 complemented with the foamy-virus envelope, we show that this was not an effect of cross  
174 packaging (**Fig-S12**), and that this rescue by the envelope glycoprotein was specific to its ability  
175 to antagonize coelacanth *SERINC2* (**Fig-4D**). To then understand the specificity of this  
176 counteraction, we checked the expression of Coelacanth *SERINC2* at protein level when co-  
177 expressed with Foamy envelope. We checked the effect with both low expression (PBJ6) and  
178 high expression(pcDNA) of Coelacanth *SERINC2* and observed that the steady state levels of  
179 Coelacanth *SERINC2* is affected in the producer cells when Foamy envelope was co-  
180 expressed (**Fig-4E**). Further, we questioned as to whether the foamy virus was at all sensitive  
181 to the effects of coelacanth *SERINC2*. To answer this, we pseudotyped a foamy-virus core,  
182 now, with an envelope glycoprotein of HIV-1 lacking a c-terminal domain, for packaging of a  
183 heterologous foamy core since the native, full-length, envelope glycoprotein of HIV-1 was not  
184 capable of the packaging it. After successful packaging using c-terminally deleted HIV  
185 envelope, we show that intrinsically the foamy core is sensitive coelacanth *SERINC2* restriction  
186 (**Fig 4F**). This advocates that foamy-virus is indeed sensitive to coelacanth *SERINC2* and has  
187 developed a mechanism to antagonize the inhibitory effect through the envelope glycoprotein  
188 likely as part of an ongoing arms-race.

189

## 190 Discussion

191 The use of comparative evolutionary genetic approaches has continued to enrich our  
192 understanding of restriction factor biology for more than a decade(24–28). Reciprocal loss of  
193 duplicated genes in different species has been shown to contribute to species-specific  
194 differences in susceptibility to pathogens(29–32). Similar to reciprocal gene loss, we find that  
195 *SERINC2* and *SERINC5* show reciprocal functional adaptation against divergent retroviruses.  
196 The ability of these orthologous factors to restrict HIV-1 is remarkable, even in the heterologous  
197 hosts (**Fig1E, 2C and Fig-S13**) suggestive of a topology associated feature that remained  
198 conserved and contribute to virus restriction. Further, the *SERINC*s from a human can restrict  
199 divergent viruses, like MLV(16,17), EIAV(15,18), this only indicates a long-term interaction of  
200 these host factors which exerted a strong selective pressure in order to shape retrovirus

201 evolution. While exogenous retroviruses have not yet been reported from pre-WGD species  
202 that we considered, the range of targets that a pre-WGD *SERINC* (TMS-1) will have remains  
203 to be identified. The restriction on mobility of genetic elements in yeast has earlier been shown  
204 conserved in APOBEC(33). While genes such as CCR4 and DHH1 that physically interact with  
205 TMS-1 have been implicated in yeast retrotransposon activity (34,35) the mechanism that TMS-  
206 1 would manifest on retroelements remains to be investigated. TMS-1 in fly may still be required  
207 to regulate the mobility of gypsy retroelements as the gypsy envelope has been shown to  
208 pseudotype MoMLV-based vector to efficiently infect fly cells (36,37). Moreover, the analogous  
209 mechanism that Rous sarcoma virus uses to produce Pr180gag-pol has been found in yeast  
210 Ty-1 transposons (38), makes such existence of retroelement interactions for other host-factors  
211 like TMS-1 more probable. Post-WGD, *SERINC* has five copies and this may have been  
212 associated with tackling increasing diversity of pathogens during speciation and while doing so  
213 retaining its core function. As demonstrated here, with cross-packaging studies we show that  
214 *SERINC2* ortholog, which was thought to be inactive, may potentially have constituted a critical  
215 barrier to foamy viruses early on, leading to their divergence over more than 450 MY (23,39).  
216 Loss of activity in other *SERINC2* orthologs may have been associated with  
217 neofunctionalization: as suggested by localized sequence divergence (**Fig-S14**), presence of  
218 HNF4alpha binding enhancer (**Fig-S15**) and change in tissue-specific expression patterns (**Fig-**  
219 **S16**) exemplified by expression of *SERINC2* in the liver of primates. Interestingly, Coelacanth  
220 *SERINC2* inhibited HIV-1 and remained invisible to the most powerful retroviral virulent factors  
221 nef (MAC239) and to the glycoGag. Further studies can provide more insights into the lack of  
222 activity in these retroviral factors.

223 The ability of foamy virus envelope to counteract the restriction is first such evidence where a  
224 canonical gene product is employed to evade *SERINC* restriction by these atypical retroviruses.  
225 Foamy viruses co-diverged with their hosts, and this consistently is also visible in their ability to  
226 introduce variations in envelope glycoproteins, among other documented genomic alterations.  
227 Such changes perhaps are required for its efficient association with cognate entry receptors or  
228 prevent host mechanisms from inhibiting the virus propagation. The nature of many such  
229 interactions remains to be clarified due to the unavailability of reagents to study the phenotype  
230 in its native context. The counteraction phenotype associated with foamy envelope  
231 demonstrated here is not unexpected due to following the reason. It has been earlier suggested  
232 that *SERINC5*-mediated particle inhibition varies with the HIV-1 envelope from various isolates  
233 (16,40,41); indicating envelope as a determinant for *SERINC5*-sensitivity to particle restriction  
234 as also recently demonstrated in (ref 38). Moreover, in the case of EIAV and MLV envelope the  
235 ability to resist *SERINC5* action has been observed (16,18). Constant engagement of *SERINC5*  
236 by the host seems to have therefore acted as a driving force during the evolution of these  
237 retroviruses. Having found foamy envelope-dependent activity among coelacanth *SERINC2* is  
238 therefore not surprising and is in agreement with previous reports (42,43) suggesting an ability  
239 of envelope to interact with *SERINC*. As a result, an early challenge by this host factor leading  
240 to subsequent divergence of foamy envelope towards insensitivity to *SERINC* restriction. The

241 change in foamy envelope glycoproteins among coelacanth endogenous foamy virus and a  
242 prototype foamy attest these facts that there may have been a selective pressure imposed by  
243 *SERINC2*. Different *SERINC* paralogs might have specialized to restrain specific viruses  
244 leading to coevolution of viruses in response to specific paralog.

245 We foresee that weaker signatures, exemplified by *SERINC*s (**Fig-1D, S3**) despite the constant  
246 challenge from viruses, could be due to the native functions endowed to such transmembrane  
247 proteins where the adaptation through diversification in-response to the pathogen would result  
248 in a loss of a core function (44). The poor signatures could also be because the antiretroviral  
249 activity is spread out over multiple host genes e.g. as a recent report shows that a Nef-sensitive  
250 TIM1 activity is potentiated by *SERINC5* (45). The host, therefore, can afford such redundancy  
251 without having to diversify much. Another example is TLRs where the extracellular domain  
252 shows signatures of recurrent positive selection in contrast to the conserved membrane-  
253 spanning region (9). Intriguingly, virus specific TLRs are under stronger purifying selection than  
254 non-viral TLRs (46) potentially due to the larger number of PAMPs associated with non-viral  
255 pathogens. This constraint however may be more pronounced in *SERINC*s as they are multi-  
256 pass transmembrane proteins known to inhibit only retroviruses. This nevertheless is indicative  
257 of more *SERINC*-like restriction factors that display poor signatures of arms-race but are  
258 functionally active. The core function of *SERINC*s in eukaryotes awaits independent  
259 observations nevertheless, the most recent effort in providing structural insights into the fly and  
260 human ortholog (42) opens up avenues for structure-inspired biological perturbations.

261 Despite being conserved, *SERINC*s have managed to diversify their function against distinct  
262 retroviruses. In order to explain these dynamics of *SERINC*-retrovirus evolution, we first  
263 collated all the known interactions of *SERINC*s with retroviral factors (**Fig-5A**). Since *SERINC1*  
264 and *SERINC4* are not translated from the native transcripts in the conditions that have been  
265 probed, we reasoned that their presence might have been associated with extinct retroviral  
266 factors. Investigation of *SERINC1* and *SERINC4* orthologs in diverse species, might be able to  
267 decipher the proposed interactions (**Fig-5A**). In contrast to *SERINC1* and *SERINC4*, we find  
268 evidence for *SERINC2* being counteracted by retroviral factor from foamy virus. Having  
269 investigated all the available data, we decided to propose a model of co-evolution between  
270 *SERINC*s and retroviruses that could explain the diversification of function despite weak  
271 signatures of arms-race. Host-driven changes to the viral genome sequence is similar to niche-  
272 filling models used to explain evolution of phenotypic traits (47). Hence, we reasoned that  
273 divergence of *SERINC* paralogs following WGD would result in divergence of the niches a virus  
274 can occupy. Not surprisingly, we find that viruses have evolved two types of retroviral  
275 antagonists to resist *SERINC* restriction. These types reflect the distinct niches that viruses can  
276 occupy. In contrast to previously proposed host-driven models of virus evolution characterized  
277 by host adaptation and host-switches, our model suggests the creation of host-niches within  
278 the same organism due to divergence of paralogous gene copies. We illustrate our model using  
279 the example of post-WGD diversification of interaction between *SERINC*s and distinct types of  
280 retroviral factors (**Fig-5B**).

281 In conclusion, evolution-guided analysis for tracking the origin of anti-viral activity in the  
282 *SERINC* genes and the dynamics following whole-genome duplication have identified the  
283 presence of antiretroviral activity in the only *SERINC* thought to be deficient. The ancient  
284 antiretroviral activity among *SERINC*s seems to have challenged retroviruses for more than  
285 450 MY, as suggested by the presence of an evasion strategy in a spumavirus representative  
286 to target coelacanth *SERINC2*. The parallel emergence of anti-*SERINC* strategies among  
287 divergent retroviruses thus indicates a fundamental role of these host factors in shaping  
288 retrovirus evolution.

289

## 290 **Materials and Methods**

### 291 **Plasmids and reagents**

292 All the plasmids used were isolated using MN NucleoBond® Xtra Midi EF according to the  
293 manufacturer's instructions to minimize endotoxin content. The list of plasmids and reagents  
294 used in the experiments are tabulated in **Supplementary Table I and II**.

295

### 296 **Cell lines**

297 All cell lines used were assessed for mycoplasma contamination and were found to be negative.  
298 HEK293T and TZM-GFP indicator cell lines (previously described in Ref (16) were grown in  
299 Dulbecco's Modified Eagle's Medium (DMEM) with 10% heat-inactivated Fetal Bovine Serum),  
300 2mM L-Glutamine and 1% Penicillin-Streptomycin. Jurkat-TAg<sup>SERINC3/5KO</sup> were reported  
301 previously (18), maintained in RPMI 1640 with 10% FBS and 2mM L-Glutamine. All the cultures  
302 were maintained at 37°C and 5% CO<sub>2</sub> in a humidified incubator.

303

### 304 **Viruses and infectivity assay**

305 HIV-1 was produced from HEK293T by calcium phosphate transfection and were limited to  
306 single-cycle replication. For a 10 cm plate, 7ug NL4-3 env defective and nef defective, 1ug env  
307 expressing plasmid and 100ng of pcDNA vectors expressing *SERINC* paralogs and orthologs  
308 or equivalent empty vector and 1ug of PBJ6 *SERINC5* HA was used for virus production. For  
309 production of foamy viruses, transient transfection of 0.736 ug pCIES, 1.5ug pCIPS, 11.84ug  
310 pCIGS, 11.84 ug pΔΦ and 100ng of pcDNA vectors expressing *SERINC* paralogs and  
311 orthologs or equivalent control vector in HEK293T(10 cm plate) was done (48). The viral  
312 particles were collected 48 hours post transfection and were centrifuged at 300g for 5 min and  
313 quantified by SG-PERT reverse transcription assay (49). Following this, viruses were serially  
314 diluted 3, 9 and 27-fold for infection in TZM-GFP reporter cells that were seeded in a 96-well  
315 plate, 24 hours prior to infection. HIV-1 Infectivity was quantified by scoring the GFP positive  
316 cells using Spectra max MiniMax™ 300 imaging Cytometer (Molecular devices, USA). Foamy  
317 Virus infectivity was examined by the number of GFP positive cells indicating the population  
318 transduced by Foamy virus. The total cell population was analyzed by nuclei staining with  
319 Hoechst 33342 and visualized on CellInsight CX7 High Content Screening platform (Thermo  
320 Scientific). The acquired values were normalized with the virus titre obtained from SG-PERT



321 assay as previously described (16) Results are expressed as a percentage of an internal control  
322 sample.

323

### 324 **Immunofluorescence**

325 For electroporation in JTag<sup>SERINC3/5KO</sup>, cells were grown, and fresh medium was added a day  
326 before such that the culture concentration did not exceed 10<sup>6</sup> cells/ml. Cells in their exponential  
327 growth phase were pellet down (10<sup>7</sup> cells/sample) at 300xg for 10 mins. Prior to adding Opti-  
328 MEM, the cells were washed with 1X Phosphate Buffered Saline (PBS (1X) pH 7.0) to remove  
329 residual serum and other cell debris. Each sample was resuspended in 200ul warm  
330 OptiMEM. 5ug of constructs expressing HA-tagged *SERINC2* orthologs or equivalent control  
331 vector were then added to the cells. The cells and DNA mixture are added to a 0.2cm gap  
332 electroporation cuvette. The cells were pulsed at 140V and 1000uF with exponential decay on  
333 BioRAD GenePulser Xcell. 600ul warm RPMI with 20% FBS was immediately added to the  
334 electroporated cells, following which they were transferred to a plate containing RPMI with 10%  
335 FBS. 48 hours post transfection cells were pellet down at 300g for 5 mins and resuspended  
336 in 100ul RPMI and laid on poly-L-lysine coated coverslips and fixed with 4% paraformaldehyde.  
337 After fixation, the cells were washed twice with 1X PBS. The cells were permeabilized using  
338 BD™ Perm/wash followed by detection of HA tag with Purified anti-HA.11 Epitope Tag Antibody  
339 and Alexa 488 fluorescent tagged secondary antibody. The coverslips were transferred to a  
340 glass slide and mounted using ProLong™ Glass Antifade reagent. Images were acquired after  
341 12 hours on Zeiss confocal microscope (LSM740).

342

### 343 **Virus incorporation**

344 Viruses were produced by calcium phosphate transfection in a 10cm plate of HEK293T as  
345 mentioned above. The media was replaced with DMEM containing 2% FBS after 12-15 hours  
346 of transfection. After 48 hours, the virus containing supernatant was collected and centrifuged  
347 at 500xg for 10 mins to exclude any cell fragments. Following this, the viruses were filtered  
348 using a 0.22µm syringe filter. This was overlaid on 25% sucrose cushion and concentrated at  
349 50000xg for 2 hours at 4 degrees using a Beckmann Coulter ultracentrifuge. After the spin, the  
350 supernatant was aspirated off and the pellet was lysed in Laemmli buffer with TCEP.

351

352

### 353 **Western blotting**

354 After collection of viruses from producer cells (HEK293T), the cells were collected in 1X ice-  
355 cold PBS. They were washed twice at 500g for 5 minutes. The PBS was aspirated until the  
356 pellet was completely dry. The pellets were either processed for lysis or stored in -80 until  
357 further application. The cell pellets were lysed in DDM Lysis buffer (100mM NaCl, 10mM  
358 HEPES pH 7.5, 50mM Tris(2-carboxyethyl) phosphine hydrochloride (TCEP), 1% n-Dodecyl-  
359 β-D-maltoside (DDM), 2xcOmplete™, EDTA-free Protease inhibitor cocktail and rocked on ice

360 for 30 minutes. Following this, the lysates were centrifuged at 10000g for 15 mins and the  
361 supernatant was collected and mixed with 4x Laemmli buffer with 10mM TCEP.

362 SDS-PAGE was used for resolving cell pellets and virions for analysis by western blot. The  
363 proteins from the gel were transferred onto a PVDF membrane on a semi-dry transfer unit  
364 (Hoefer TE77) for 75 minutes with 125 Amp constant current. The membrane containing the  
365 proteins was then blocked with 2x Odyssey Blocking Buffer that was diluted with 1x TBS to  
366 make 1x Blocking buffer. After 20 minutes of blocking, Anti-HA.11 Epitope Tag Antibody  
367 (mouse) and anti-actin(rabbit) (diluted 1: 1000 in 1x blocking buffer) was used to probe the  
368 membrane to detect the *SERINC* orthologs and paralogs that were tagged with C-terminal HA  
369 tag. After incubation with the primary antibody for 1 hour, the membrane was washed thrice  
370 with 1X TBST for 5 mins. Goat anti-mouse 680 and goat anti-rabbit 800 Li-Cor antibodies were  
371 used to detect infra-red dyes signal from the membrane. The western blot was analysed on  
372 Odyssey imager system.

373

#### 374 **Reconstruction of coelacanth *SERINC5* sequence**

375 The *SERINC5* from coelacanth was found to be shorter than its annotation from its orthologs.  
376 Upon closer inspection it was found that the exons orthologous to human exons1-3 were  
377 missing in the coelacanth *SERINC5* genomic sequence. We found that the upstream region of  
378 coelacanth *SERINC5* had a gap in the genomic sequence. It was also found that the transcribed  
379 regions upstream of the gap did not correspond to *SERINC5* exons. Hence, we decided to use  
380 a chromosome walking strategy to reconstruct the missing exons, such that at least at  
381 sequence level the topology of the protein could be studied (suppl material for reconstruction  
382 of *SERINC5*).

383

#### 384 **Data and code availability**

385 The multiple sequence alignments are available for download under GNU license from the  
386 github repository <https://github.com/ceglab/RestrictionFactorsArmsRace>.

387

#### 388 **Genome correction and quality check**

389

390 In order to rule out the possibility of artefacts in evolutionary analysis that arise from errors in  
391 the sequence of genome assemblies (true even for high quality reference genomes found on  
392 ensemble(50)) we systematically assessed the quality of each of the primate genomes used in  
393 this study. Genome assemblies of 15 primate species were downloaded from ensembl release  
394 98 through the ftp site. Whole genome sequencing datasets corresponding to each of these  
395 species were obtained from the Short Read Archive (SRA) with the criteria that they should  
396 have >~30x coverage. Details of the genome assemblies used and the corresponding raw read  
397 data from each species are provided in GitHub repository. The raw read data were mapped to  
398 the corresponding genomes using the bwa mem read mapper(51) with default settings. The  
399 alignment files obtained from the mapping step were used to generate the genotype likelihood

400 estimates using the program angsd (52). The genotype likelihood estimates were provided to  
401 the program referee(53) to assign quality scores and perform genome correction. Overall, we  
402 found that in all the primate genomes considered, less than 1% of the bases were corrected by  
403 the program referee. The sequencing data used for performing genome correction are not from  
404 the same individual that was used for genome assembly. Hence, it is possible that many of the  
405 corrected positions are merely nucleotide polymorphisms.

406

#### 407 **Manual curation and multiple sequence alignment**

408 The manually curated open reading frame multi-fasta files consisting of 70 genes from ~15  
409 primate species were collected from Ensembl. We extend our previous multiple sequence  
410 alignment strategy(54) by including additional multiple sequence alignment programs to  
411 generate 8 independent alignments for each gene. Several multiple sequence alignment tools  
412 were used to ensure that the inferred patterns of sequence evolution are not restricted to the  
413 alignment strategy used. The choice of the actual multiple sequence alignment tools used was  
414 based on the performance-based classification of algorithms (55).

415

#### 416 **Use of FUBAR to find evolutionary fingerprints**

417 Traditional approaches that endeavour to find arms race signatures in genes look for recurrent  
418 occurrence of positive selection in the same gene in different evolutionary lineages. A more  
419 recent approach has been to use the full joint distribution of synonymous ( $\alpha$ ) and  
420 nonsynonymous ( $\beta$ ) rates as an evolutionary fingerprint of a gene(19). The program  
421 FUBAR(56) is available as part of the HyPhy package(57). Pairs of conditionally dependent  
422 sites were identified using the program BGM(58). Estimates of selection coefficients are  
423 inferred from the multiple sequence alignments for pairs of  $\alpha$ -  $\beta$  combinations that form a  
424 discretized grid. We calculated the distance measure defined by Murrel(19) to perform  
425 hierarchical clustering of the selection signatures obtained from FUBAR.

426

427

#### 428 **Acknowledgements**

429 This work is supported by IYBA fellowship (BT/010/IYBA/2017/01), a grant  
430 (BT/PR26013/GET/119/191/2017) from the Department of Biotechnology, Government of  
431 India, and the Wellcome Trust/DBT India Alliance Fellowship [grant number IA/I/18/2/504006  
432 awarded to AC]. PR, VB and AS are supported by a fellowship from the MHRD, CSIR and DBT  
433 respectively. The computational analyses were performed on the Har Gobind Khorana  
434 Computational Biology cluster. Authors thank Jeremy Luban, and the NIH AIDS Reagent  
435 Program for the reagents and cell lines. Authors are grateful to Massimo Pizzato for his critical  
436 inputs and reagent support.

437

#### 438 **References**

439 1. Koonin E V., Dolja V V., Krupovic M. Origins and evolution of viruses of eukaryotes:

- 440 The ultimate modularity. *Virology*. 2015.
- 441 2. Malfavon-Borja R, Sawyer SL, Wu LI, Emerman M, Malik HS. An evolutionary screen  
442 highlights canonical and noncanonical candidate antiviral genes within the primate  
443 TRIM gene family. *Genome Biol Evol*. 2013;
- 444 3. Papparisto E, Woods MW, Coleman MD, Moghadasi SA, Kochar DS, Tom SK, et al.  
445 Evolution-Guided Structural and Functional Analyses of the HERC Family Reveal an  
446 Ancient Marine Origin and Determinants of Antiviral Activity. *J Virol*. 2018;
- 447 4. Daugherty MD, Schaller AM, Geballe AP, Malik HS. Evolution-guided functional  
448 analyses reveal diverse antiviral specificities encoded by ifit1 genes in mammals. *Elife*.  
449 2016;
- 450 5. Sackton TB, Lazzaro BP, Clark AG, Wittkopp P. Rapid expansion of immune-related  
451 gene families in the house fly, *musca domestica*. *Mol Biol Evol*. 2017;
- 452 6. Kasahara M. Genome Duplication and T Cell Immunity. In: *Progress in molecular  
453 biology and translational science*. 2010. p. 7–36.
- 454 7. Dehal P, Boore JL. Two Rounds of Whole Genome Duplication in the Ancestral  
455 Vertebrate. Holland P, editor. *PLoS Biol*. 2005 Sep;3(10):e314.
- 456 8. Duggal NK, Emerman M. Evolutionary conflicts between viruses and restriction factors  
457 shape immunity. *Nat Rev Immunol*. 2012;12(10):687–95.
- 458 9. Wlasiuk G, Khan S, Switzer WM, Nachman MW. A history of recurrent positive  
459 selection at the toll-like receptor 5 in primates. *Mol Biol Evol*. 2009;
- 460 10. Daugherty MD, Young JM, Kerns JA, Malik HS. Rapid Evolution of PARP Genes  
461 Suggests a Broad Role for ADP-Ribosylation in Host-Virus Conflicts. *PLoS Genet*.  
462 2014;
- 463 11. Boso G, Buckler-White A, Kozak CA. Ancient Evolutionary Origin and Positive  
464 Selection of the Retroviral Restriction Factor Fv1 in Muroid Rodents . *J Virol*. 2018;
- 465 12. Compton AA, Malik HS, Emerman M. Host gene evolution traces the evolutionary  
466 history of ancient primate lentiviruses. *Philosophical Transactions of the Royal Society  
467 B: Biological Sciences*. 2013.
- 468 13. Harris RS, Hultquist JF, Evans DT. The restriction factors of human immunodeficiency  
469 virus. *Journal of Biological Chemistry*. 2012.
- 470 14. McLaren PJ, Gawanbacht A, Pyndiah N, Krapp C, Hotter D, Kluge SF, et al.  
471 Identification of potential HIV restriction factors by combining evolutionary genomic  
472 signatures with functional analyses. *Retrovirology*. 2015;
- 473 15. Firrito C, Bertelli C, Vanzo T, Chande A, Pizzato M. SERINC5 as a New Restriction  
474 Factor for Human Immunodeficiency Virus and Murine Leukemia Virus. *Annu Rev  
475 Virol*. 2018;
- 476 16. Rosa A, Chande A, Ziglio S, De Sanctis V, Bertorelli R, Goh SL, et al. HIV-1 Nef  
477 promotes infection by excluding SERINC5 from virion incorporation. *Nature*.  
478 2015;526(7572):212–7.
- 479 17. Usami Y, Wu Y, Göttlinger HG. SERINC3 and SERINC5 restrict HIV-1 infectivity and  
480 are counteracted by Nef. *Nature*. 2015;526(7572):218–23.
- 481 18. Chande A, Cuccurullo EC, Rosa A, Ziglio S, Carpenter S, Pizzato M. S2 from equine  
482 infectious anemia virus is an infectivity factor which counteracts the retroviral inhibitors  
483 SERINC5 and SERINC3. *Proc Natl Acad Sci U S A*. 2016;113(46).
- 484 19. Murrell B, Vollbrecht T, Guatelli J, Wertheim JO. The Evolutionary Histories of

- 485 Antiretroviral Proteins SERINC3 and SERINC5 Do Not Support an Evolutionary Arms  
486 Race in Primates. *J Virol.* 2016 Jun 29;
- 487 20. Shaw AE, Hughes J, Gu Q, Behdenna A, Singer JB, Dennis T, et al. Fundamental  
488 properties of the mammalian innate immune system revealed by multispecies  
489 comparison of type I interferon responses. *PLoS Biol.* 2017;
- 490 21. Lynch M. The Age and Relationships of the Major Animal Phyla. *Evolution* (N Y).  
491 1999;
- 492 22. Ahmad I, Li S, Li R, Chai Q, Zhang L, Wang B, et al. The retroviral accessory proteins  
493 S2, Nef, and glycoMA use similar mechanisms for antagonizing the host restriction  
494 factor SERINC5. *J Biol Chem.* 2019;
- 495 23. Han GZ, Worobey M. An endogenous foamy-like viral element in the coelacanth  
496 genome. *PLoS Pathog.* 2012;
- 497 24. Sawyer SL, Wu LI, Emerman M, Malik HS. Positive selection of primate  
498 TRIM5 identifies a critical species-specific retroviral restriction domain. *Proc Natl  
499 Acad Sci.* 2005;
- 500 25. Newman RM, Hall L, Connole M, Chen G-L, Sato S, Yuste E, et al. Balancing  
501 selection and the evolution of functional polymorphism in Old World monkey TRIM5 .  
502 *Proc Natl Acad Sci.* 2006;
- 503 26. McLaughlin RN, Gable JT, Wittkopp CJ, Emerman M, Malik HS. Conservation and  
504 Innovation of APOBEC3A Restriction Functions during Primate Evolution. *Mol Biol  
505 Evol.* 2016;
- 506 27. Johnson WE. Rapid adversarial co-evolution of viruses and cellular restriction factors.  
507 *Curr Top Microbiol Immunol.* 2013;
- 508 28. Blanco-Melo D, Venkatesh S, Bieniasz PD. Origins and Evolution of tetherin, an  
509 Orphan Antiviral Gene. *Cell Host Microbe* [Internet]. 2016 Aug 10 [cited 2017 Jul  
510 5];20(2):189–201. Available from:  
511 <http://linkinghub.elsevier.com/retrieve/pii/S193131281630258X>
- 512 29. Meng X, Zhang F, Yan B, Si C, Honda H, Nagamachi A, et al. A paralogous pair of  
513 mammalian host restriction factors form a critical host barrier against poxvirus  
514 infection. *PLoS Pathog.* 2018;
- 515 30. Browne EP, Littman DR. Species-Specific Restriction of Apobec3-Mediated  
516 Hypermutation. *J Virol.* 2008;
- 517 31. Mitchell PS, Patzina C, Emerman M, Haller O, Malik HS, Kochs G. Evolution-guided  
518 identification of antiviral specificity determinants in the broadly acting interferon-  
519 induced innate immunity factor MxA. *Cell Host Microbe.* 2012;
- 520 32. Mitchell PS, Young JM, Emerman M, Malik HS. Evolutionary Analyses Suggest a  
521 Function of MxB Immunity Proteins Beyond Lentivirus Restriction. *PLoS Pathog.* 2015;
- 522 33. Dutko JA, Schäfer A, Kenny AE, Cullen BR, Curcio MJ. Inhibition of a yeast LTR  
523 retrotransposon by human APOBEC3 cytidine deaminases. *Curr Biol.* 2005;
- 524 34. Irwin B, Aye M, Baldi P, Beliakova-Bethell N, Cheng H, Dou Y, et al. Retroviruses and  
525 yeast retrotransposons use overlapping sets of host genes. *Genome Res.* 2005;
- 526 35. Miller JE, Zhang L, Jiang H, Li Y, Pugh BF, Reese JC. Genome-wide mapping of  
527 decay factor-mRNA interactions in yeast identifies nutrient-responsive transcripts as  
528 targets of the deadenylase Ccr4. *G3 Genes, Genomes, Genet.* 2018;
- 529 36. Llorens J V., Clark JB, Martínez-Garay I, Soriano S, De Frutos R, Martínez-Sebastián

- 530 MJ. Gypsy endogenous retrovirus maintains potential infectivity in several species of  
531 Drosophilids. *BMC Evol Biol.* 2008;
- 532 37. Teyssset L, Burns JC, Shike H, Sullivan BL, Bucheton A, Terzian C. A Moloney Murine  
533 Leukemia Virus-Based Retroviral Vector Pseudotyped by the Insect Retroviral gypsy  
534 Envelope Can Infect *Drosophila* Cells. *J Virol.* 1998;
- 535 38. Mellor J, Fulton SM, Dobson MJ, Wilson W, Kingsman SM, Kingsman AJ. A retrovirus-  
536 like strategy for expression of a fusion protein encoded by yeast transposon Ty1.  
537 *Nature.* 1985;
- 538 39. Aiweusakun P, Katzourakis A. Marine origin of retroviruses in the early Palaeozoic Era.  
539 *Nat Commun.* 2017;
- 540 40. Beitari S, Ding S, Pan Q, Finzi A, Liang C. The effect of HIV-1 Env on SERINC5  
541 antagonism. *J Virol* [Internet]. 2016;(December):JVI.02214-16. Available from:  
542 <http://jvi.asm.org/lookup/doi/10.1128/JVI.02214-16>
- 543 41. Sood C, Marin M, Chande A, Pizzato M, Melikyan GB. SERINC5 protein inhibits HIV-1  
544 fusion pore formation by promoting functional inactivation of envelope glycoproteins. *J*  
545 *Biol Chem* [Internet]. 2017 Apr 7 [cited 2017 May 26];292(14):6014–26. Available  
546 from: <http://www.ncbi.nlm.nih.gov/pubmed/28179429>
- 547 42. Pye, V.E., Rosa, A., Bertelli C et al. A bipartite structural organization defines the  
548 SERINC family of HIV-1 restriction factors. *Nat Struct Mol Biol.* 2020;27:78–83.
- 549 43. Beitari S, Ding S, Pan Q, Finzi A, Liang C. Effect of HIV-1 Env on SERINC5  
550 Antagonism. *J Virol.* 2017;91(4).
- 551 44. Sojo V, Dessimoz C, Pomiankowski A, Lane N. Membrane Proteins Are Dramatically  
552 Less Conserved than Water-Soluble Proteins across the Tree of Life. *Mol Biol Evol.*  
553 2016;
- 554 45. Li M, Waheed AA, Yu J, Zeng C, Chen HY, Zheng YM, et al. TIM-mediated inhibition  
555 of HIV-1 release is antagonized by Nef but potentiated by SERINC proteins. *Proc Natl*  
556 *Acad Sci U S A.* 2019;
- 557 46. Liu G, Zhang H, Zhao C, Zhang H. Evolutionary History of the Toll-Like Receptor  
558 Gene Family across Vertebrates. Enard D, editor. *Genome Biol Evol* [Internet]. 2020  
559 Jan 1 [cited 2020 Feb 7];12(1):3615–34. Available from:  
560 <https://academic.oup.com/gbe/article/12/1/3615/5652095>
- 561 47. Simmonds P, Aiweusakun P, Katzourakis A. Prisoners of war — host adaptation and its  
562 constraints on virus evolution. *Nat Rev Microbiol.* 2019;
- 563 48. Trobridge G, Josephson N, Vassilopoulos G, Mac J, Russell DW. Improved foamy  
564 virus vectors with minimal viral sequences. *Mol Ther.* 2002;6(3):321–8.
- 565 49. Pizzato M, Erlwein O, Bonsall D, Kaye S, Muir D, McClure MO. A one-step SYBR  
566 Green I-based product-enhanced reverse transcriptase assay for the quantitation of  
567 retroviruses in cell culture supernatants. *J Virol Methods* [Internet]. 2009 Mar [cited  
568 2017 Jun 19];156(1–2):1–7. Available from:  
569 <http://www.ncbi.nlm.nih.gov/pubmed/19022294>
- 570 50. Mittal P, Jaiswal SK, Vijay N, Saxena R, Sharma VK. Comparative analysis of  
571 corrected tiger genome provides clues to its neuronal evolution. *Sci Rep* [Internet].  
572 2019 Dec 5 [cited 2020 Jan 13];9(1):18459. Available from:  
573 <http://www.nature.com/articles/s41598-019-54838-z>
- 574 51. Li H. [Heng Li - Compares BWA to other long read aligners like CUSHAW2] Aligning  
575 sequence reads, clone sequences and assembly contigs with BWA-MEM. *arXiv Prepr*  
576 *arXiv.* 2013;

- 577 52. Korneliussen TS, Albrechtsen A, Nielsen R. ANGSD: Analysis of Next Generation  
578 Sequencing Data. BMC Bioinformatics. 2014;
- 579 53. Thomas GWC, Hahn MW. Referee: Reference assembly quality scores. Genome Biol  
580 Evol. 2019;
- 581 54. Shinde SS, Teekas L, Sharma S, Vijay N. Signatures of Relaxed Selection in the  
582 CYP8B1 Gene of Birds and Mammals. J Mol Evol. 2019;
- 583 55. Blackburne BP, Whelan S. Class of multiple sequence alignment algorithm affects  
584 genomic analysis. Mol Biol Evol. 2013;
- 585 56. Murrell B, Moola S, Mabona A, Weighill T, Sheward D, Kosakovsky Pond SL, et al.  
586 FUBAR: A fast, unconstrained bayesian AppRoximation for inferring selection. Mol  
587 Biol Evol. 2013;
- 588 57. Kosakovsky Pond SL, Frost SDW, Muse S V. HyPhy: Hypothesis testing using  
589 phylogenies. Bioinformatics. 2005;
- 590 58. Avino M, Poon AFY. Detecting Amino Acid Coevolution with Bayesian Graphical  
591 Models. In: Methods in Molecular Biology. 2019.

592

## 593 Figure Legends

594

595 **Figure 1.** The activity of *SERINC* paralogs and orthologs on HIV-1 infectivity

- 596 A) The activity of Human *SERINC* paralogs (*SERINC1-SERINC5*) on nef-defective HIV-  
597 1 Infectivity. (n=4, mean  $\pm$  s.d., unpaired t-test, (\*)p<0.05 (\*\*)p<0.01 (\*\*\*)p<0.001, ns-  
598 not significant). Lower panel, Western blot showing expression of c-terminally HA-  
599 tagged *SERINC* and the corresponding B-actin from cell lysate (HEK293T). Values  
600 obtained from the empty vector control was normalized to 100% for comparison with  
601 *SERINC* expressors
- 602 B) Representative images of TZM-GFP cells infected with viruses produced for Fig-1A.  
603 Cells are stained with Hoechst and captured at 10x magnification on CellInsight CX7  
604 High Content Screening platform. Scale-100 $\mu$ m
- 605 C) Immunofluorescence assay for the indicated HA-tagged human *SERINC1-5*  
606 transfected in JTAg *SERINC5/3<sup>-/-</sup>* cells and visualized using Alexa 488 secondary  
607 antibody. Scale- 10 $\mu$ m
- 608 D) Hierarchical clustering of the arms-race signatures in primate genes aligned using  
609 ClustalW aligner and used as input for FUBAR. Interferon-induced genes identified by  
610 (Shaw et al 2017) are color-coded as red (upregulated), blue(downregulated), green  
611 (*SERINC* paralogs), grey (other select genes)
- 612 E) The activity of pre-and-post-WGD *SERINC5* orthologs on nef-defective HIV-1  
613 infectivity. (n=4, mean  $\pm$  s.d., unpaired t-test, (\*)p<0.05 (\*\*)p<0.01 (\*\*\*)p<0.001, ns-  
614 not significant). Lower panel, Western blot showing expression of indicated orthologs  
615 tagged with HA and the corresponding B-actin from cell lysate (HEK293T)
- 616 F) Representative images of TZM-GFP cells infected with viruses produced for Fig-1E.  
617 Cells are stained with Hoechst and captured at 10x magnification on Cell Insight CX7  
618 High Content Screening platform. Scale- 100 $\mu$ m
- 619 G) Immunofluorescence assay for indicated HA-tagged *SERINC* orthologs transfected in  
620 JTAg *SERINC5/3<sup>-/-</sup>* cells and visualized using Alexa 488 secondary antibody. Scale-  
621 10 $\mu$ m

622 **Figure 2-** Coelacanth *SERINC2* inhibits HIV-1 infectivity

- 623 A. A Schematic timeline depicting the sequence of events during the course of evolution  
624 with species depicted from left to right being *S. cerevisiae*, *D. melanogaster*, *L.*  
625 *chalumnae*, *X. tropicalis*, *G.gallus*, *E. caballus*, *M. musculus* and *H. sapiens*

- 626 B. The activity of *SERINC2* from coelacanth and human *SERINC2* isoforms on nef-  
627 defective HIV-1 infectivity. Values obtained from the empty vector control was  
628 normalized to 100% for comparison with *SERINC* expressors. (n=4, mean  $\pm$  s.d.,  
629 unpaired t-test, (\*) p<0.05 (\*\*)p<0.01 (\*\*\*)p<0.001, ns-not significant). Lower panel,  
630 Representative images of TZM-GFP cells infected with viruses produced for top  
631 panel. Cells are stained with Hoechst and captured at 10x magnification on  
632 CellInsight CX7 High Content Screening platform. Scale-100 $\mu$ m  
633 C. The activity of *SERINC2* orthologs from coelacanth, xenopus, gallus, mus, equus and  
634 human on nef-defective HIV-1 infectivity. Values obtained from the empty vector  
635 control was normalized to 100% for comparison with *SERINC* expressors. (n=4,  
636 mean  $\pm$  s.d., unpaired t-test, (\*)p<0.05 (\*\*)p<0.01 (\*\*\*)p<0.001, ns-not significant).  
637 Lower panel, western blot showing expression of *SERINC2* orthologs tagged with HA  
638 and the corresponding B-actin from cell lysate (HEK293T).  
639 D. Representative images of TZM-GFP cells infected with viruses produced for Fig-2C.  
640 Cells are stained with Hoechst and captured at 10x magnification on Cell Insight CX7  
641 High Content Screening platform. Scale-100 $\mu$ m  
642 E. Immunofluorescence from for indicated HA-tagged *SERINC* orthologs transfected in  
643 JTAg *SERINC5*/3<sup>-/-</sup> cells and visualized using Alexa 488 secondary antibody. Scale-  
644 10 $\mu$ m

645 **Figure 3-** The ability of retroviral factors to antagonize *SERINC*s

- 646 A. The ability of Nef and glycoGag to counteract indicated *SERINC2* orthologs. Human  
647 *SERINC5* was served as control for Nef and glycoGag counteraction of the  
648 restriction. Values obtained from the empty vector control without Nef or glycoGag  
649 was normalized to 100% for comparison with *SERINC* expressors  
650 B. Representative images of TZM-GFP cells infected for viruses produced for Fig-3A.  
651 Cells are stained with Hoechst and captured at 10x magnification on Cell Insight CX7  
652 High Content Screening platform. Scale-100 $\mu$ m  
653 C. The ability of nef alleles to antagonize indicated *SERINC2* orthologs. Human  
654 *SERINC5* is used as a control  
655 D. Susceptibility of HIV-1 clade-B (HXB2 and JR-FL), clade-C (ZM109F, CAP210) and  
656 VSV envelope glycoprotein (VSV-G) to inhibition of infectivity by coelacanth  
657 *SERINC2* with human *SERINC2* and *SERINC5* as controls.  
658 E. Phylogenetic tree depicting the relationship among various retroviruses. Unknown  
659 retroviral interactions with *SERINC*s are shown in the black ellipse while the known  
660 ones are in blue. Branches colored red are complex lentiviruses, blue are gamma  
661 retroviruses and green are foamy viruses.

662 **Figure 4-** The effect of Coelacanth *SERINC2* on Foamy virus infectivity and antagonism by  
663 the envelop glycoprotein

- 664 A. Genome organization of an endogenous foamy virus (CoeFV) from coelacanth and  
665 the prototype foamy virus (FV)  
666 B. Infectivity of foamy virus-derived vector and a nef-defective HIV-1 in the presence of  
667 indicated human *SERINC* paralogs and *SERINC2* orthologs. Foamy virus and HIV-1  
668 infectivity obtained from the empty vector control was normalized to 100% for  
669 comparison with *SERINC* expressors  
670 C. Nef-defective HIV-1 infectivity obtained from the empty vector control, normalized to  
671 100% for comparison, and with human *SERINC5*. Each foamy virus plasmids  
672 expressing different components (gag, pol and env) along with the transfer vector  
673 (p $\delta\phi$ ) were used for its ability to counteract human *SERINC5*. SIV MAC239 Nef was  
674 used as a control. Lower panel, representative images of TZM-GFP cells infected  
675 with viruses produced for Fig-4C. Cells are stained with Hoechst and captured at 10x  
676 magnification on CellInsight CX7 High Content Screening platform. Scale-100 $\mu$ m  
677  
678 D. Nef-defective HIV-1 infectivity obtained from the empty vector control, normalized to



679 100% for comparison, and with Coelacanth *SERINC2*. Each foamy virus plasmids  
680 expressing different components (gag, pol and env) along with the transfer vector  
681 (p $\delta\phi$ ) were used for its ability to counteract Coelacanth *SERINC2*. Lower panel,  
682 representative images of TZM-GFP cells infected with viruses produced for Fig-4D.  
683 Cells are stained with Hoechst and captured at 10x magnification on CellInsight CX7  
684 High Content Screening platform. Scale-100 $\mu$ m

685 E. Western blot showing varying expression of Coelacanth *SERINC2*-HA (from PBJ6  
686 and pcDNA vectors) and the corresponding B-actin from cell lysate (HEK293T) in the  
687 presence and absence of Foamy virus envelope expressor.

688 F. The sensitivity of the foamy core to the action of coelacanth *SERINC2*. The foamy  
689 core was trans-complemented with either Foamy envelope, HIV-1 envelope or HIV-1  
690 envelope lacking a c-terminal domain and indicated *SERINC* was co-expressed to  
691 check the ability of individual *SERINC* to restrict foamy virus. (n = 4, mean  $\pm$  s.d.,  
692 unpaired t-test).

693

694 **Figure-5.** Schematic representation of *SERINC*-retrovirus interactions

695 A. *SERINC* antagonists (Glycogag, Nef and S2) from distant retroviruses. An  
696 interaction between known and hypothesized virulent factors with *SERINC* paralogs.  
697 Solid lines show experimentally demonstrated interactions while the dotted lines  
698 represent hypothesized interactions. Color-coding for extinct and extant virulent  
699 factors (VF). Extinct VFs are shown in light blue, the extant VFs (Type-1) are in  
700 purple and Type-2 are in black.

701 B. A proposed model for adaptive co-evolution among retroviral factors with *SERINC*s.  
702 The evolution of patterns of interactions between viral factors and *SERINC*s have  
703 diversified following post-whole-genome duplication.

704

## 705 **Supplementary Figure Legends**

706 **Figure S1-** Phylogenetic analysis of *SERINC* paralogs. *S. cerevisiae*, *C. elegans*, and *D.*  
707 *melanogaster* has a single copy of this gene. Whole-genome duplication that occurred in an  
708 early ancestor of mammals gave rise to a cluster of five genes divided into clusters of  
709 *SERINC1*, *SERINC2*, *SERINC3*, and *SERINC4* and *SERINC5*. Colors denote different  
710 branches of each *SERINC* in chordates. The lengths of the triangles are proportional to the  
711 number of nucleotide substitutions that have taken place in a particular branch. The tree was  
712 generated using Ensembl.

713 **Figure S2-** Topology of human *SERINC* Paralogs predicted using TOPCONS

714 **Figure S3-** Arms-race signatures of primate *SERINC* genes inferred using FUBAR

715 **Figure S4-** Distribution of sites under different selection regimes across the *SERINC* genes.  
716 The colors are inner (Blue), outer (Pink), helix (Red). Black dots are estimates of dS and red  
717 dots are dN. Pairs of conditionally dependent sites identified by the program BGM (Bayesian  
718 Graphical Model) are connected by a dotted line (see *SERINC1* and *SERINC4*). Vertical  
719 green lines correspond to the sites under purifying selection.

720 **Figure S5-** Effect of different aligners on hierarchical clustering of arms-race signatures of  
721 primate genes. Interferon induced genes identified by (Shaw et al 2017) are color coded as  
722 red (upregulated), blue(downregulated), green (*SERINC* paralogs), grey (other select genes)

723 **Figure S6-** Topology of SERINC5 orthologs predicted using Topcons. Coelacanth SERINC5  
724 was reconstructed from the RNAseq data (\*) see supplemental material for details

725 **Figure S7-** Topological features of Human SERINC2 splice isoforms and coelacanth  
726 SERINC2 predicted using TOPCONS

727 **Figure S8-** Topology of SERINC2 orthologs predicted using TOPCONS

728 **Figure S9-** Incorporation of SERINC2 orthologs in the virus particles and detection by  
729 indicated antibodies against target proteins

730 **Figure S10-** Effect of a dose-dependent expression of coelacanth SERINC2 on HIV-1  
731 infectivity

732 **Figure S11-** Counteraction of coelacanth SERINC2 restriction by a Foamy virus envelope  
733 glycoprotein

734 **Figure S12-** Reciprocal-packaging of a foamy envelope with an HIV core and sensitivity to  
735 SERINC5

736 **Figure S13-** Infectivity of HIV-1 produced from JTAgsERINC5/3KO having ectopic  
737 expression of the indicated SERINC

738 **Figure S14-** Multiple sequence alignment of SERINC2 orthologs; highlighted regions showing  
739 the sites of sequence divergence

740 **Figure S15-** Evidence for the presence of HNF4a binding site in the intron of human  
741 SERINC2 gene

742 **Figure S16-** Gene expression evolution of SERINC genes in vertebrates

743

744 **Supplementary Information:**

745 **Supplementary Table I:** List of plasmids used

746 **Supplementary Table II:** List of reagents used

747 Reconstruction of Coelacanth SERINC5

**Figure 1**

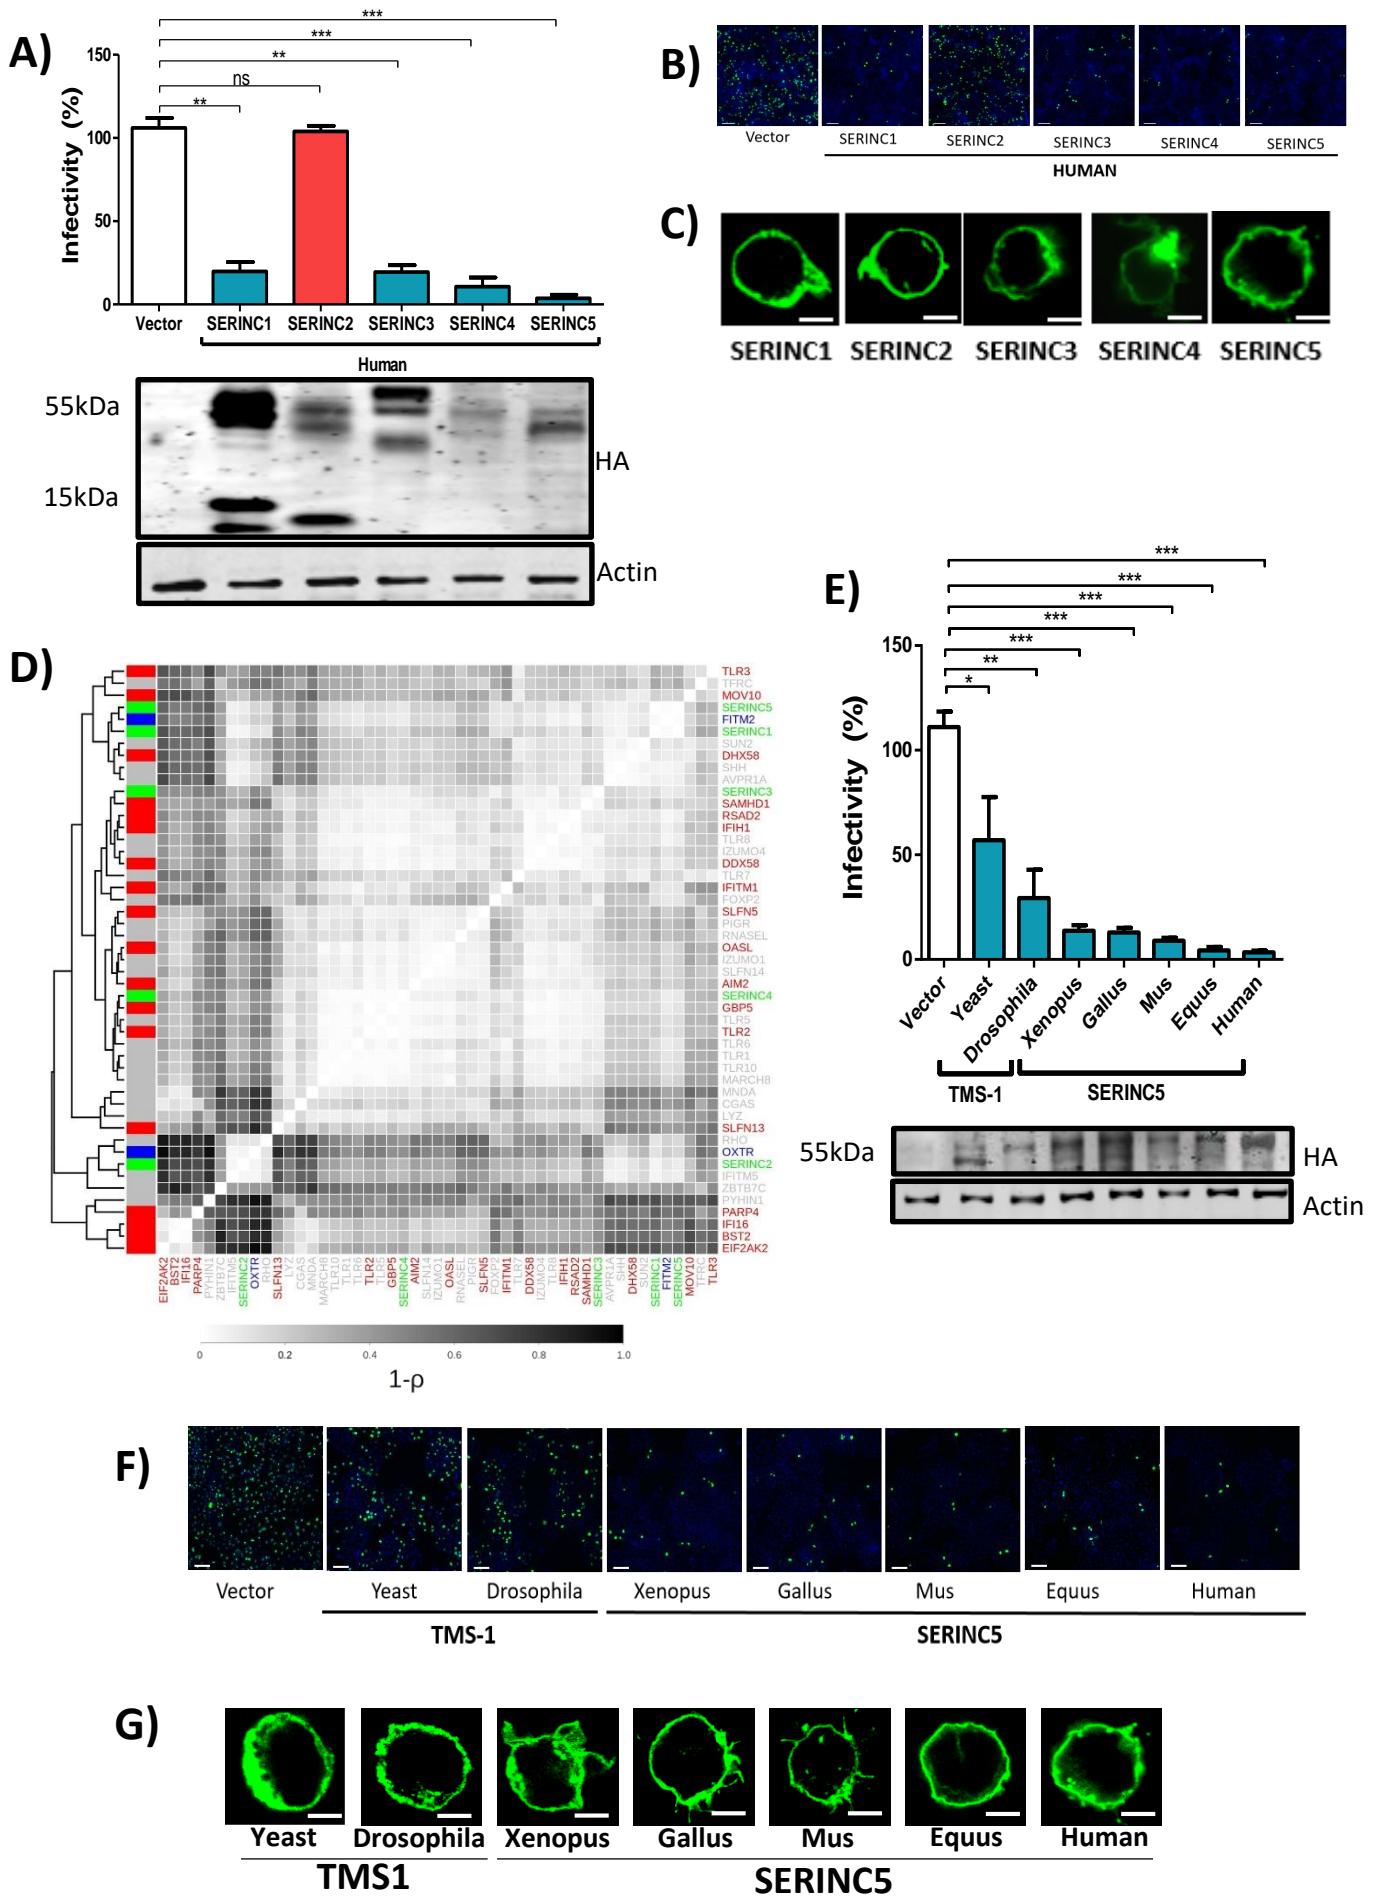

**Figure 2**

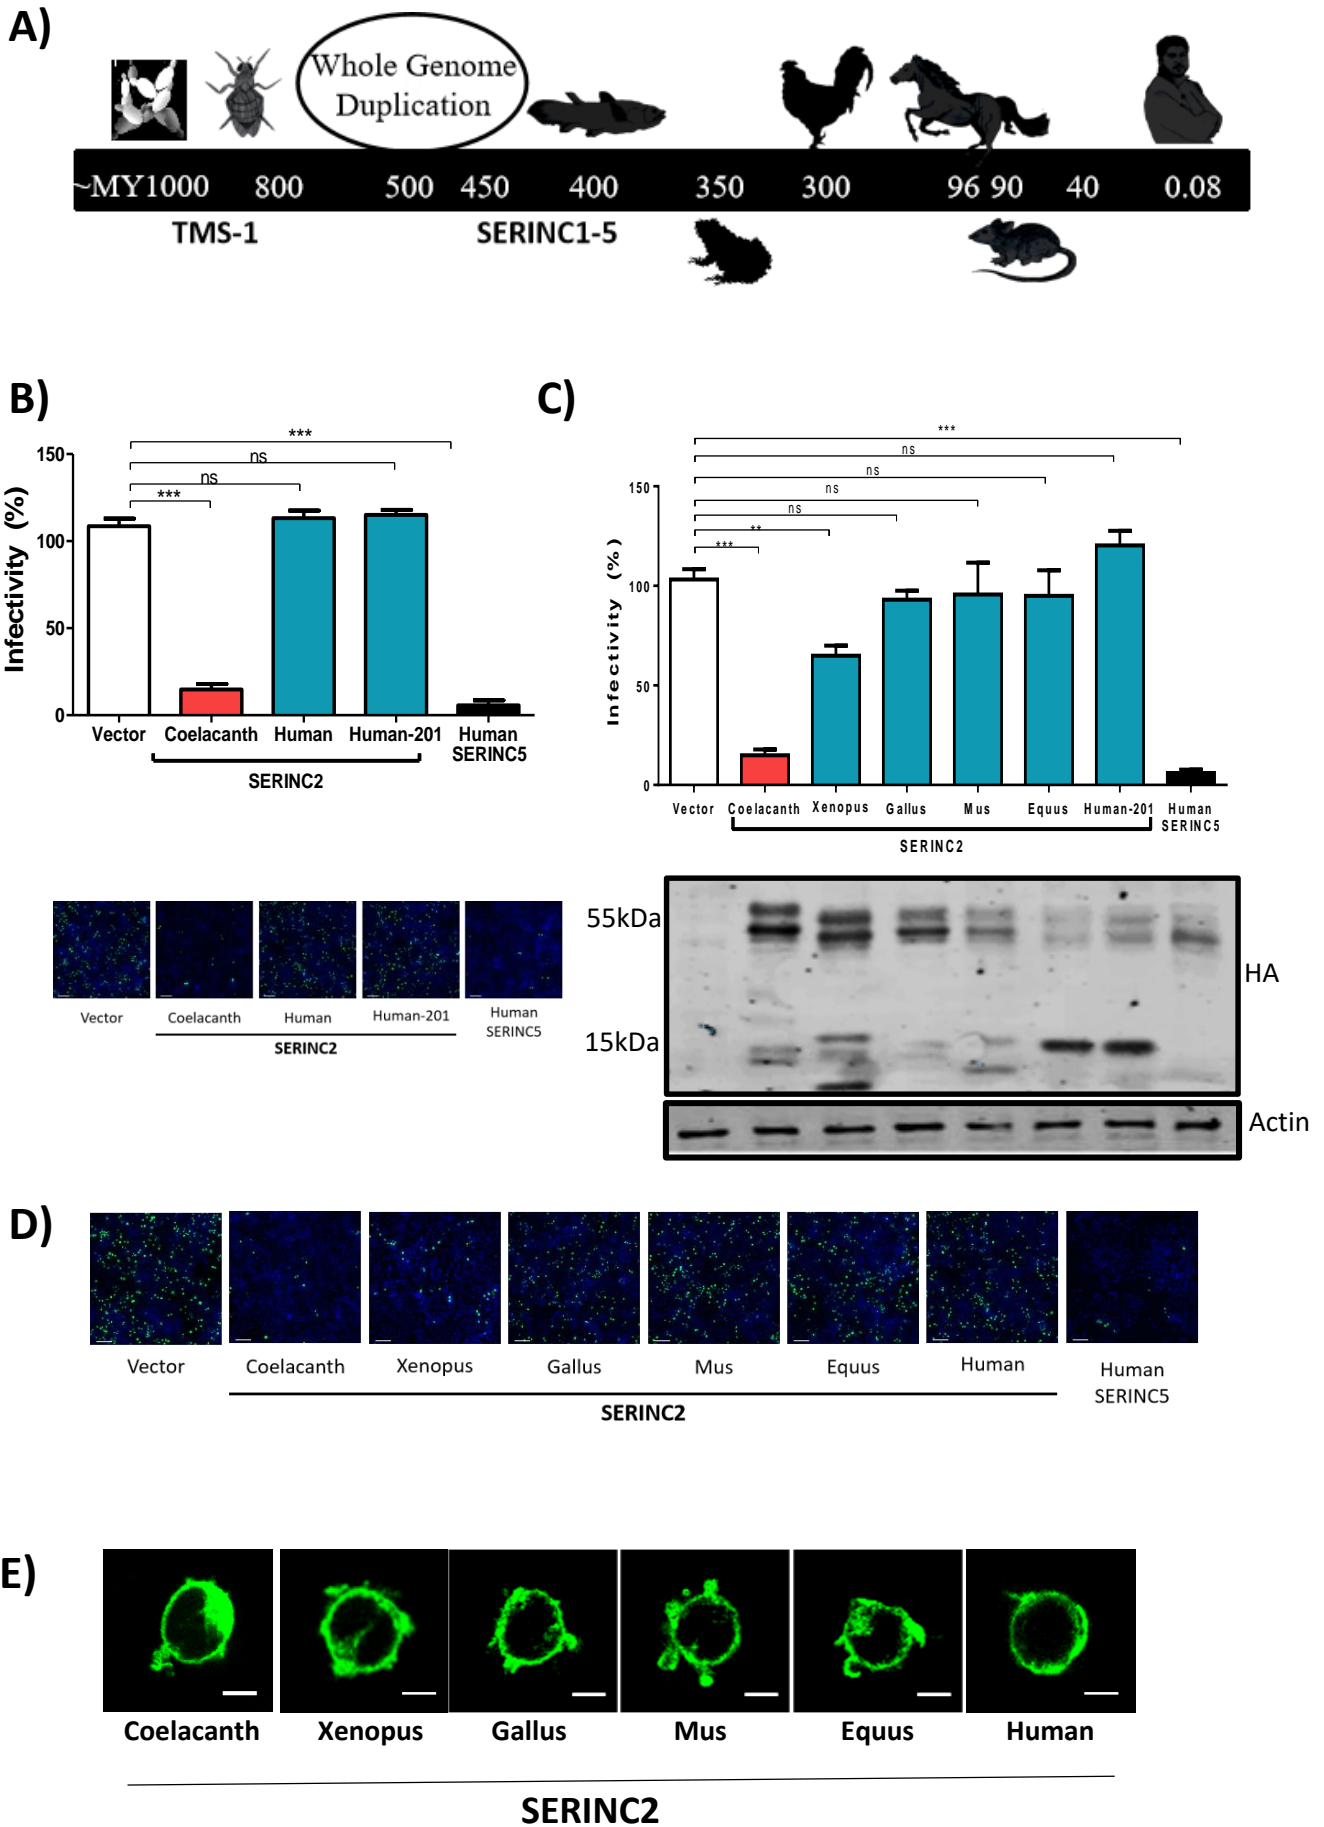

**Figure 3**

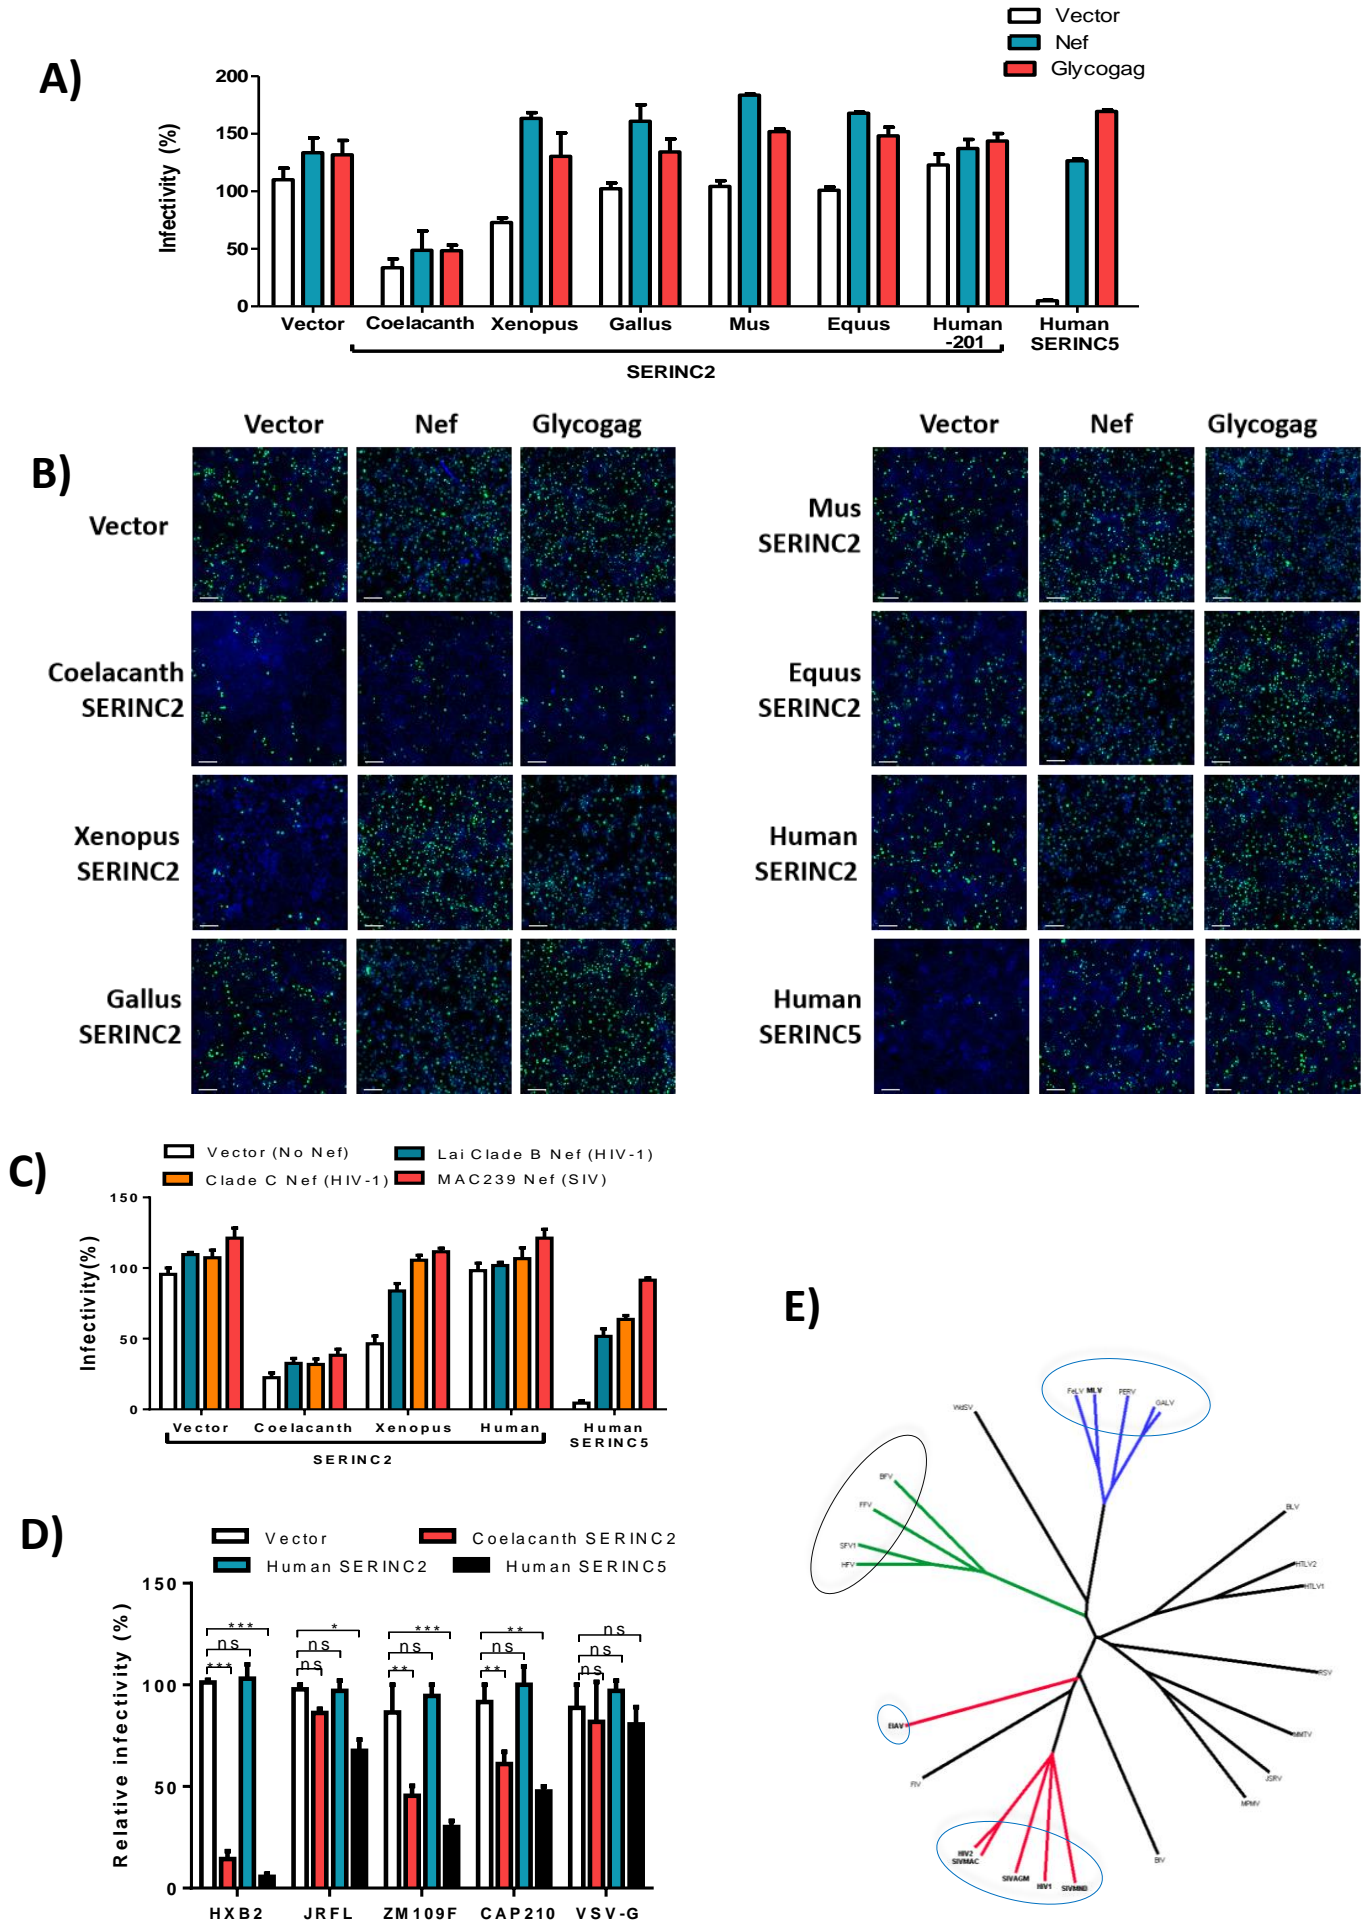

**Figure 4**

**A)**

COeFV- Coelacanth  
Endogenous Foamy virus

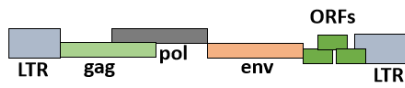

FV-Foamy virus

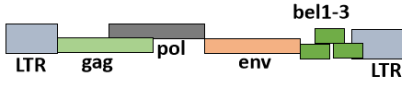

**B)**

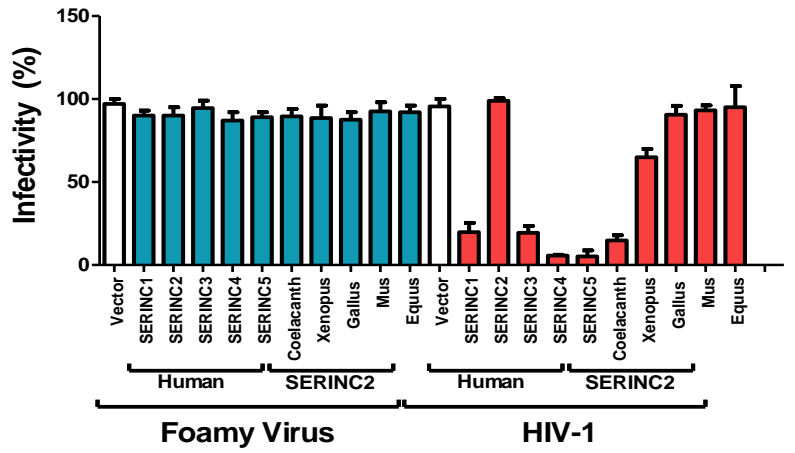

**C)**

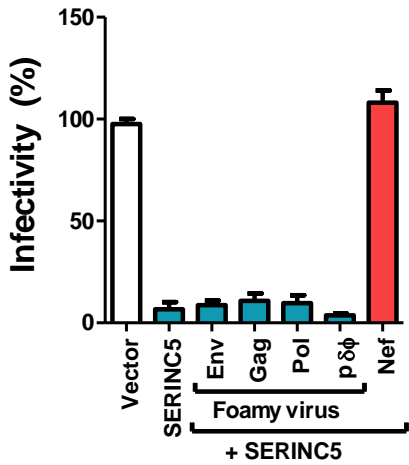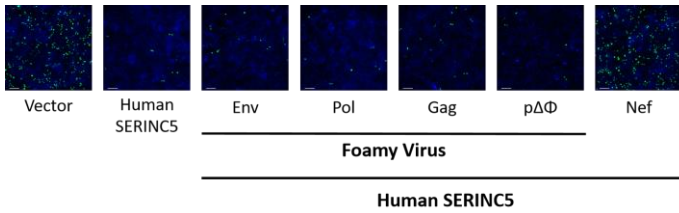

**D)**

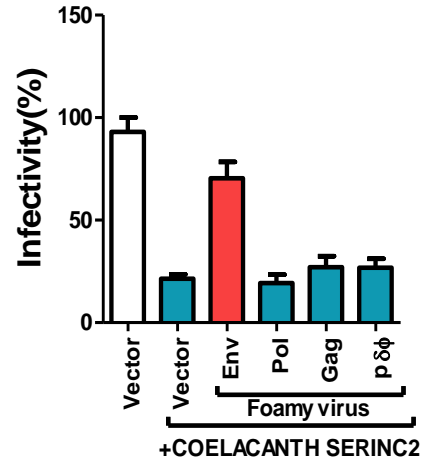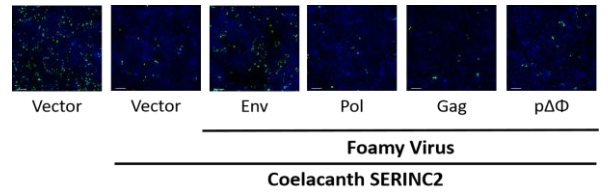

**E)**

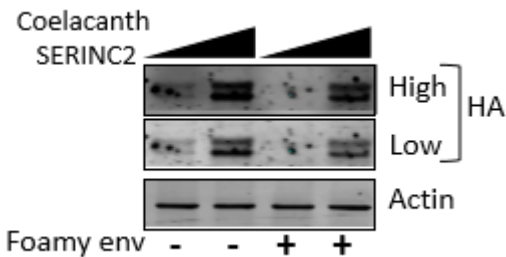

**F)**

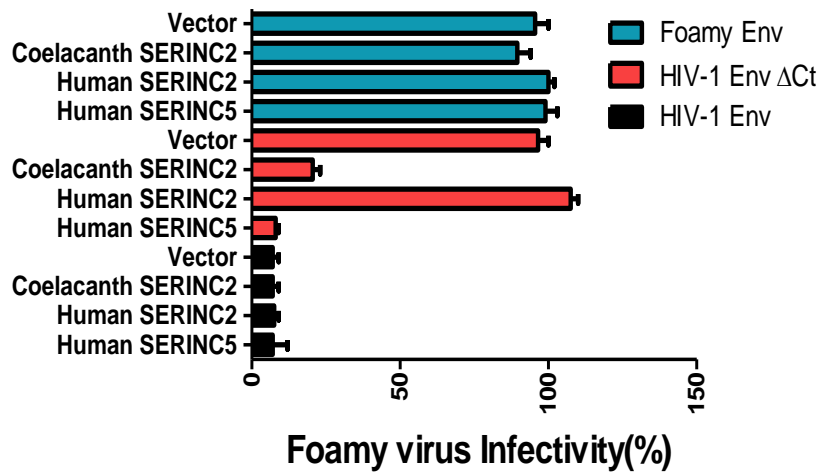

Figure 5

A

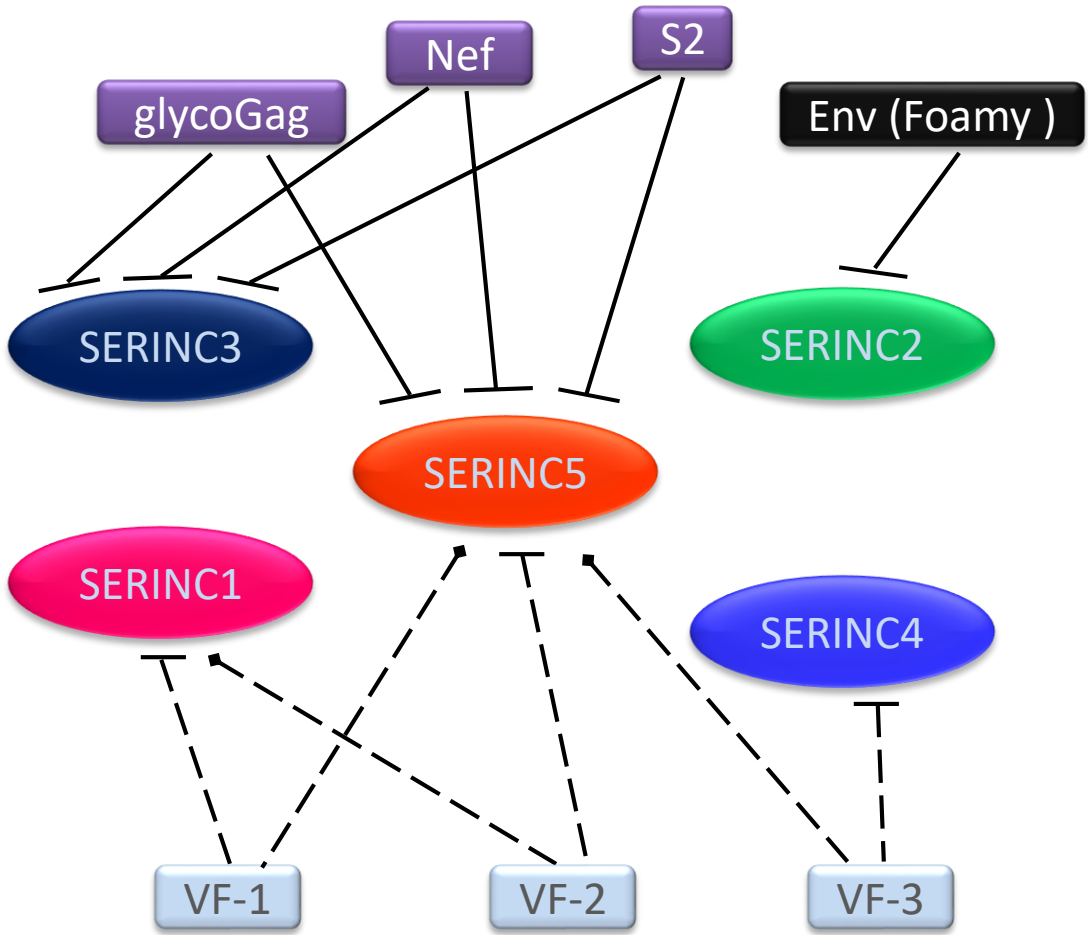

B

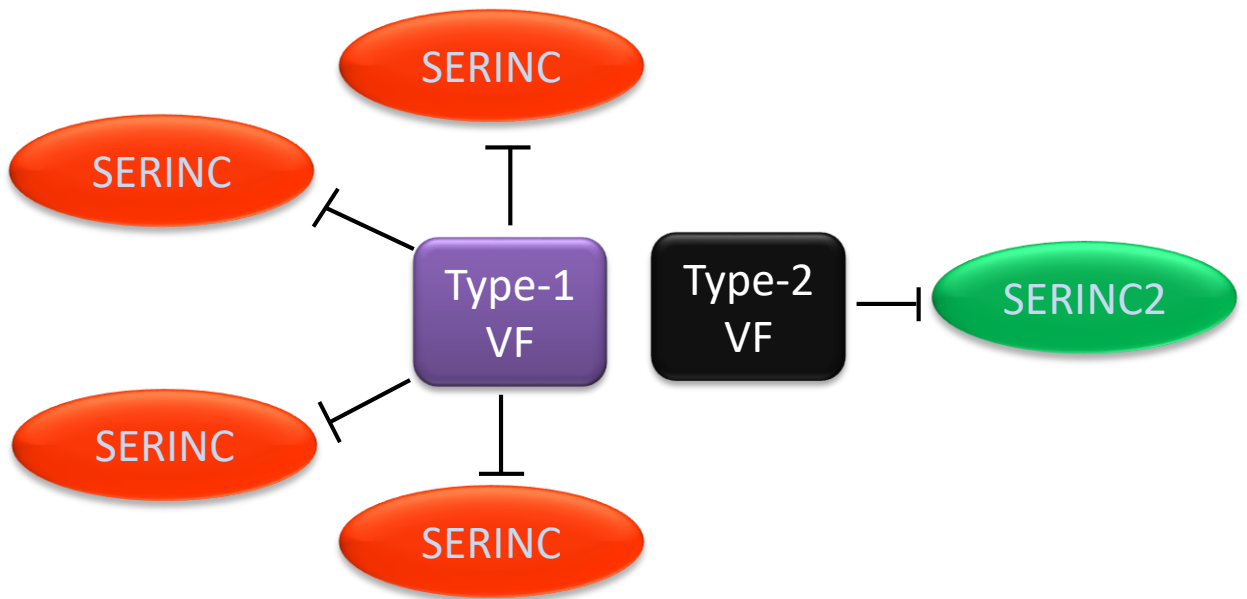

Source: https://www.biorxiv.org/content/10.1101/2020.02.24.962506v3.full.pdf
